# Supplementary material for: MiR-137 promotes TLR4/NF-κB pathway activity through targeting KDM4A, inhibits osteogenic differentiation of human bone marrow mesenchymal stem cells and aggravates osteoporosis
Source: PubMed Central journal article supplement (PMC10286393; doi:10.1186/s13018-023-03918-y), 2023-06-21
Supplement: 13018_2023_3918_MOESM1_ESM.pdf [file 13018_2023_3918_MOESM1_ESM.pdf]

Figure 2B

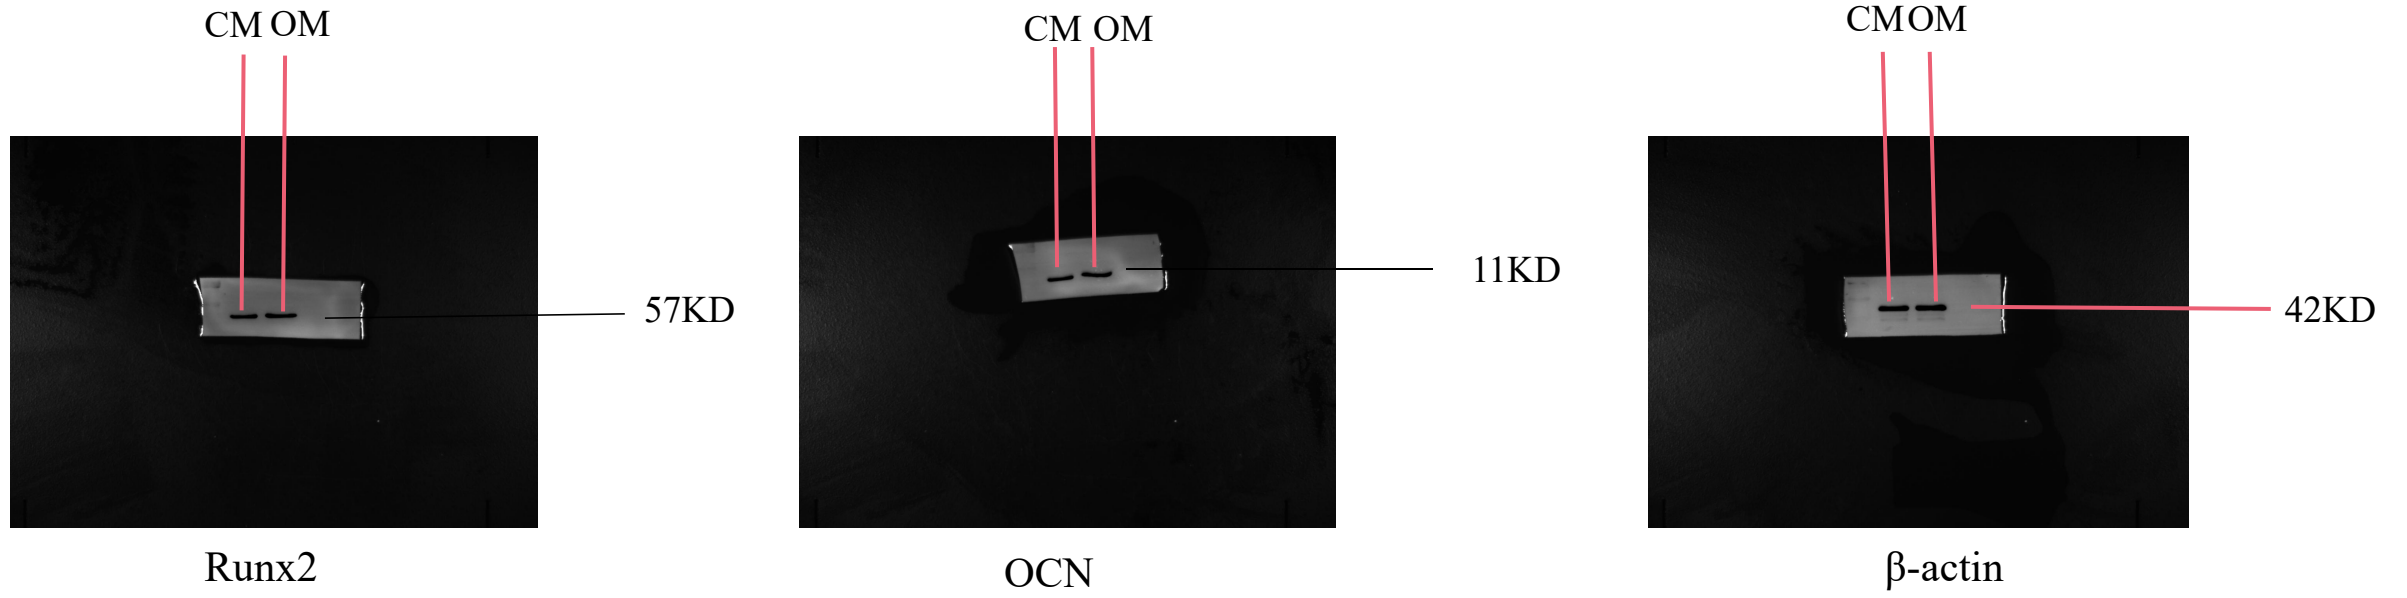

Figure 3D

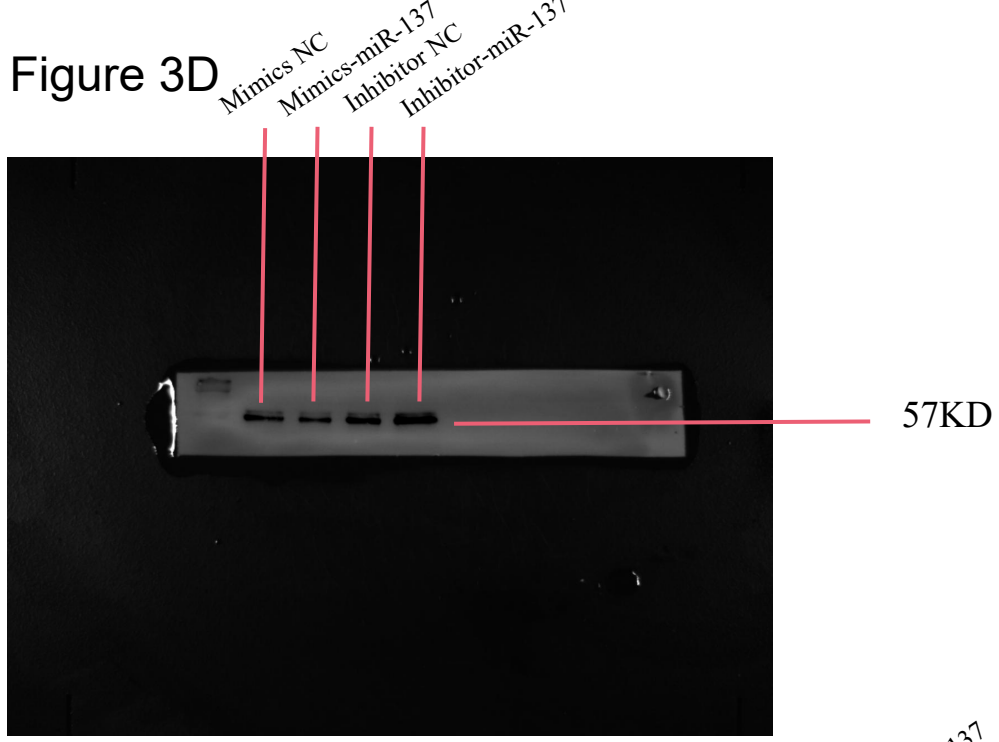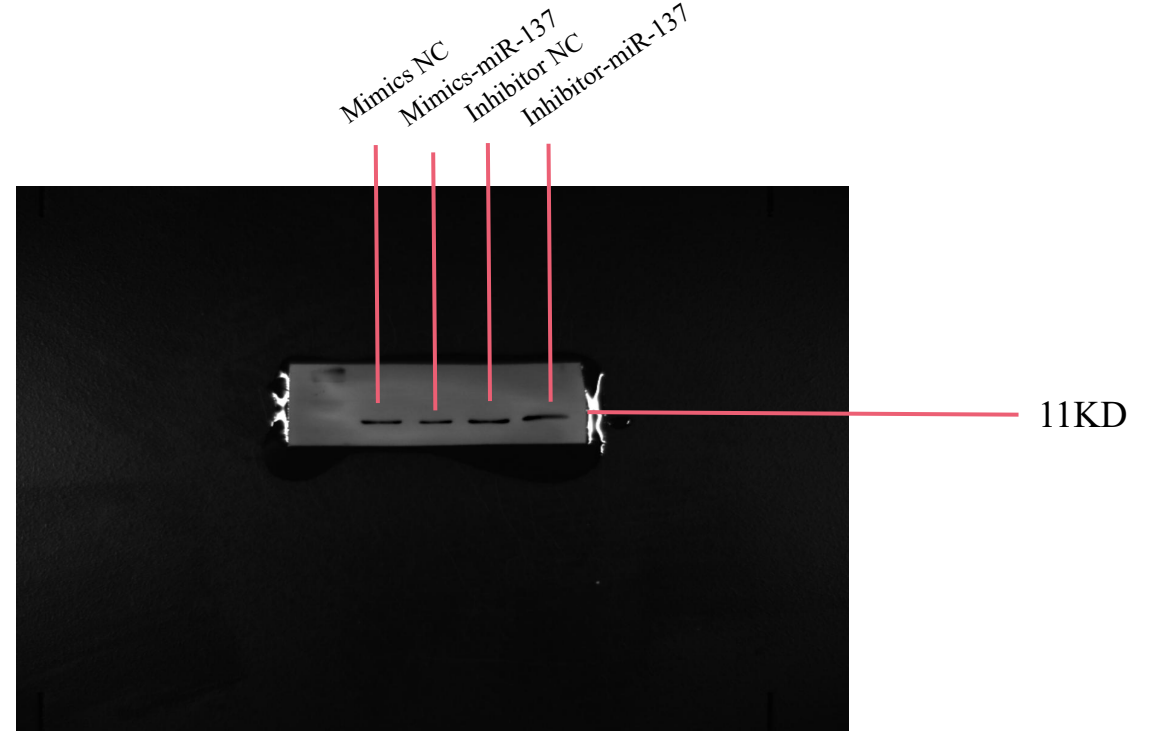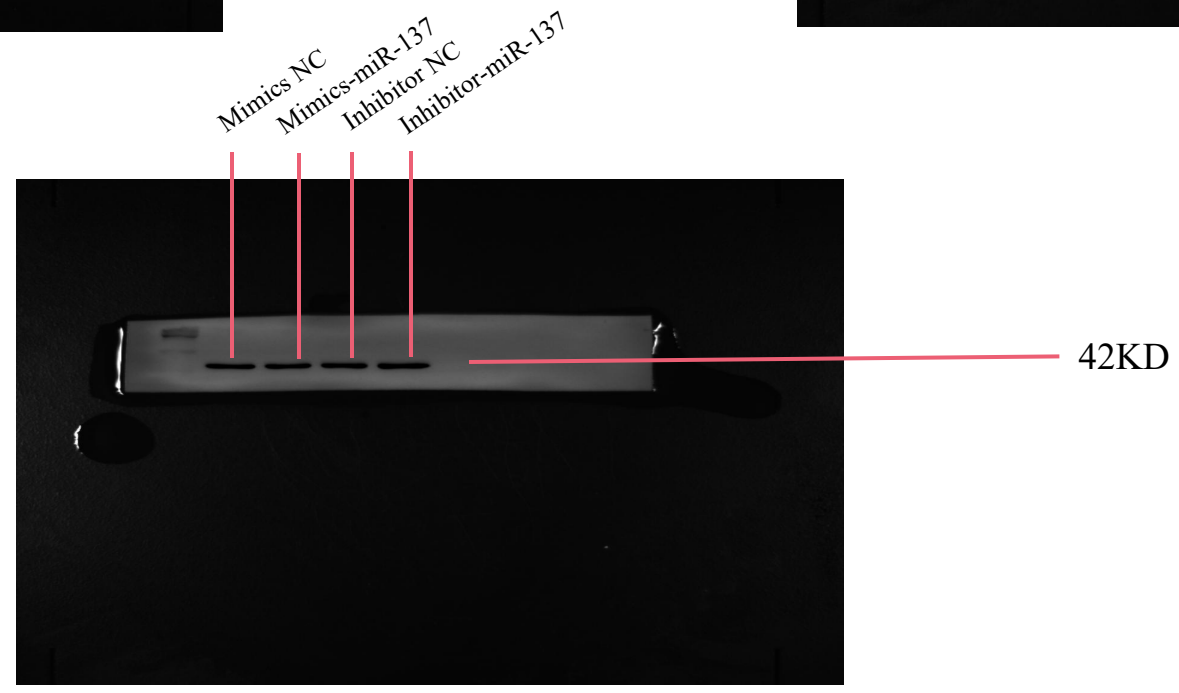

Figure 4A

Mimics NC  
Mimics-miR-137  
Inhibitor NC  
Inhibitor-miR-137

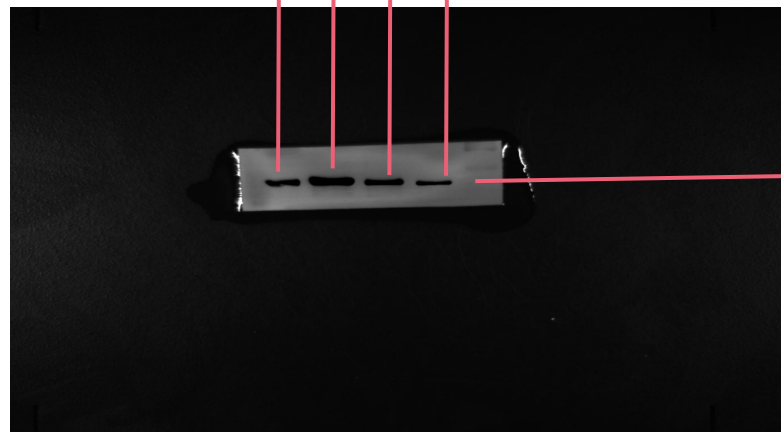

130KD

TLR4

Mimics NC  
Mimics-miR-137  
Inhibitor NC  
Inhibitor-miR-137

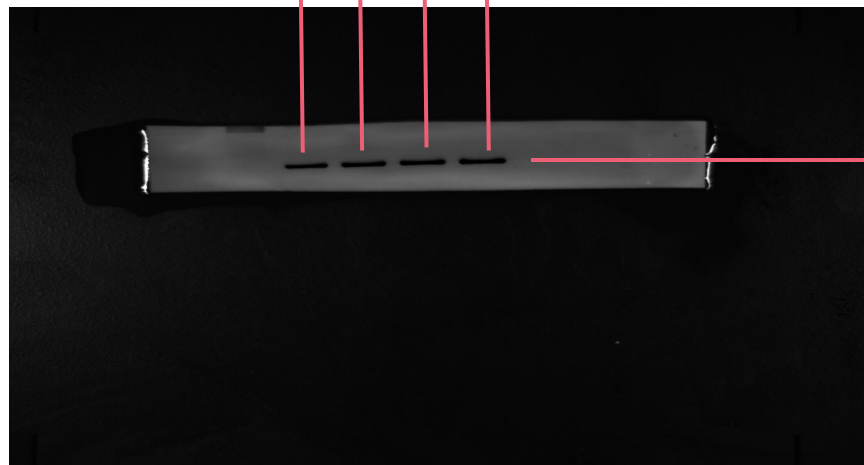

70KD

P65

Mimics NC  
Mimics-miR-137  
Inhibitor NC  
Inhibitor-miR-137

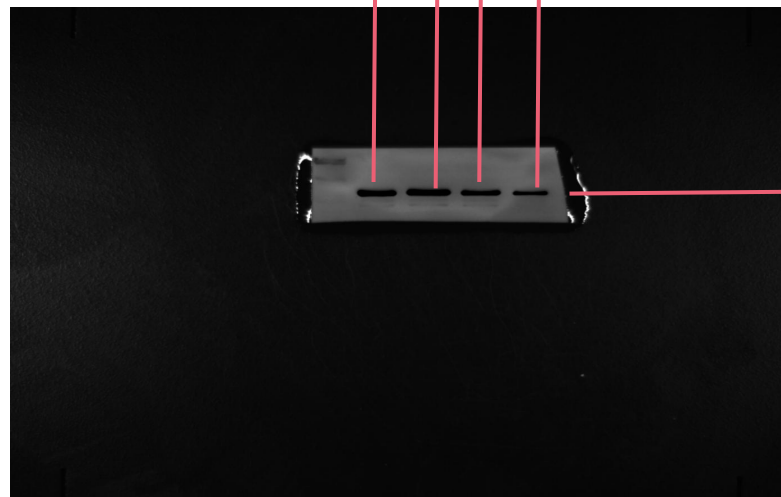

65KD

p-P65

Mimics NC  
Mimics-miR-137  
Inhibitor NC  
Inhibitor-miR-137

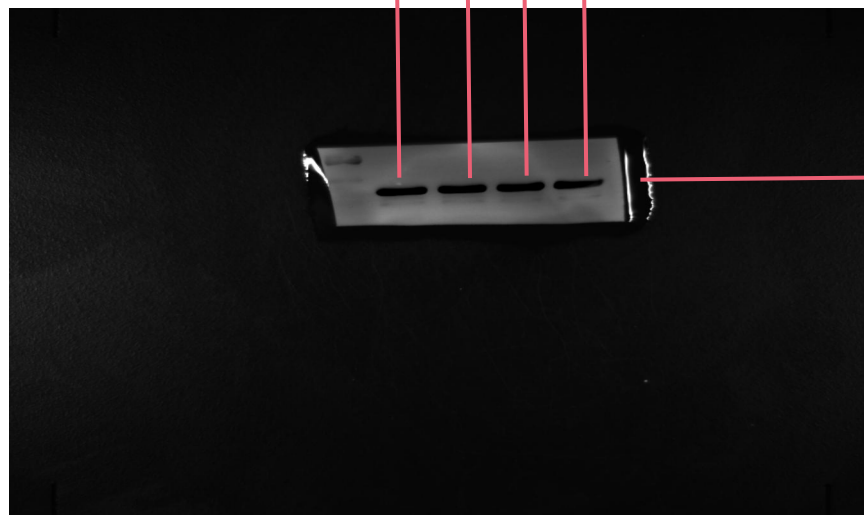

42KD

$\beta$ -actin

Figure 6D

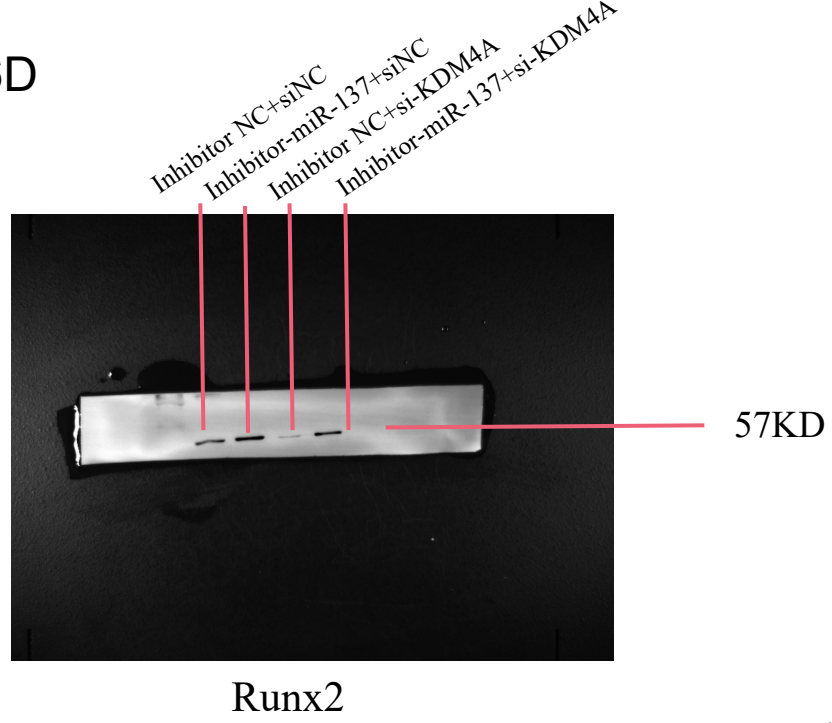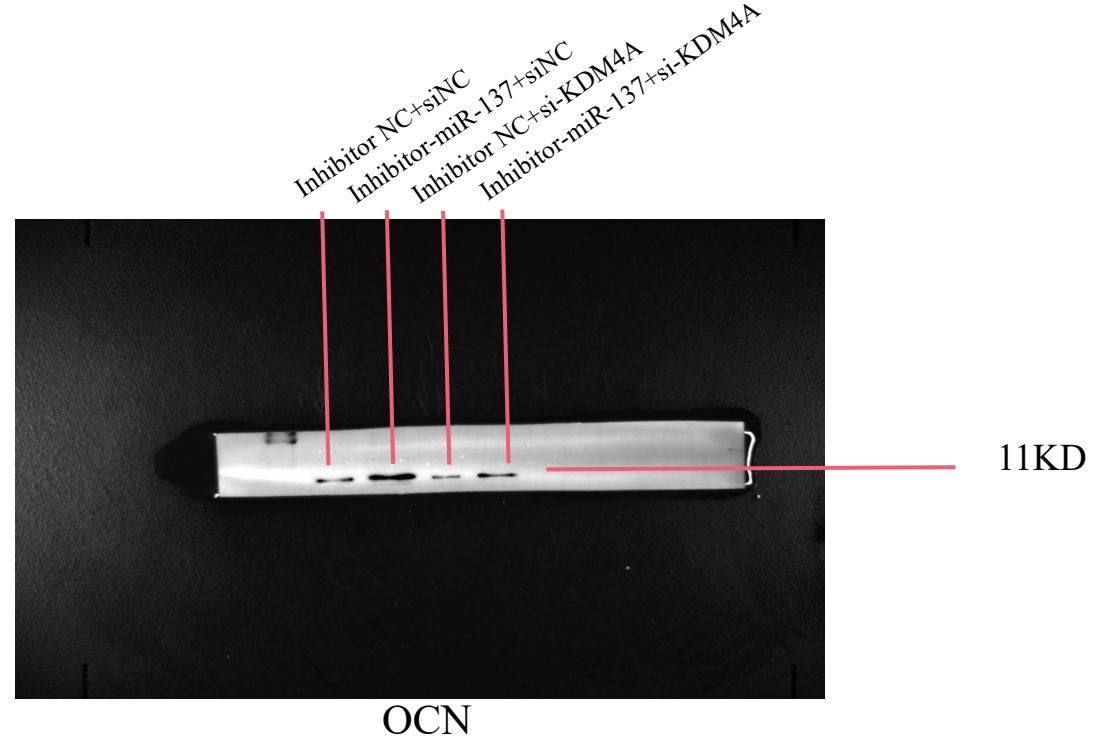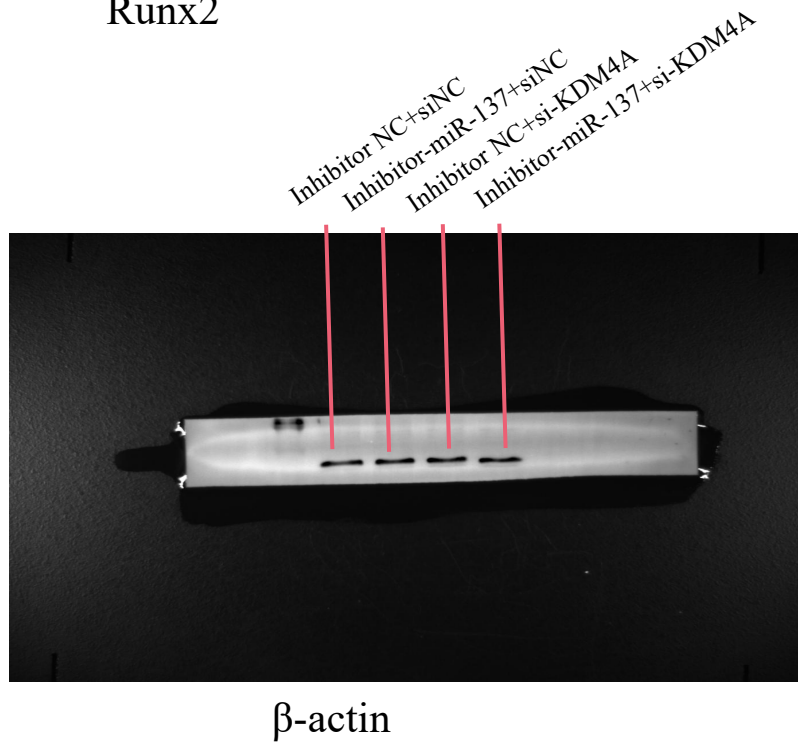

Figure 7A

Inhibitor NC+siNC  
Inhibitor-miR-137+siNC  
Inhibitor NC+si-KDM4A  
Inhibitor-miR-137+si-KDM4A

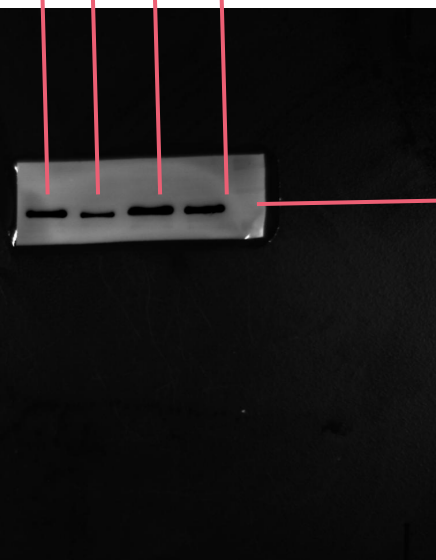

130KD

TLR4

Inhibitor NC+siNC  
Inhibitor-miR-137+siNC  
Inhibitor NC+si-KDM4A  
Inhibitor-miR-137+si-KDM4A

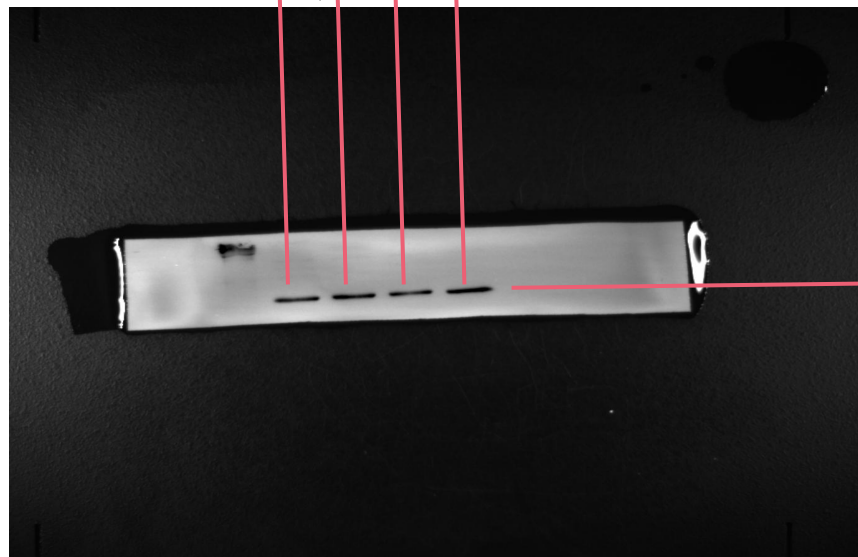

70KD

P65

Inhibitor NC+siNC  
Inhibitor-miR-137+siNC  
Inhibitor NC+si-KDM4A  
Inhibitor-miR-137+si-KDM4A

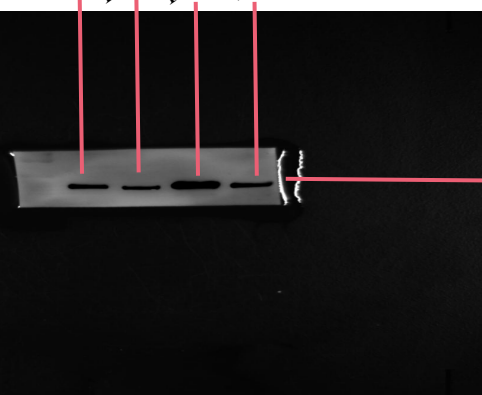

65KD

p-P65

Inhibitor NC+siNC  
Inhibitor-miR-137+siNC  
Inhibitor NC+si-KDM4A  
Inhibitor-miR-137+si-KDM4A

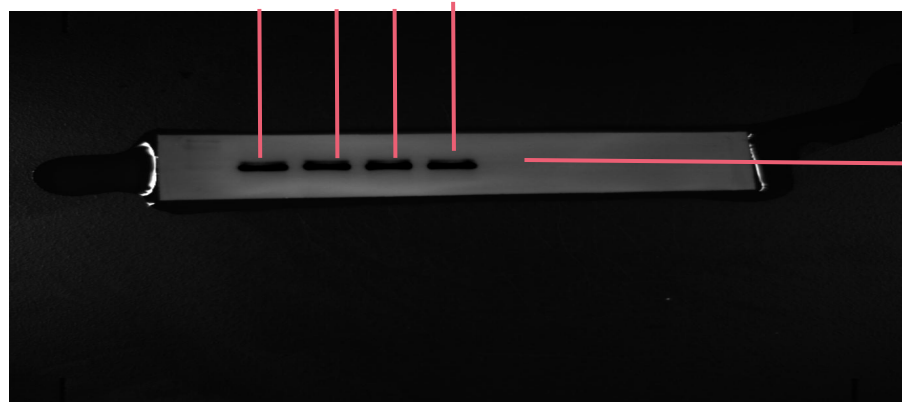

42KD

$\beta$ -actin
